# Supplementary material
Source: publisher figshare collection journal article supplement (https://frontiersin.figshare.com/ndownloader/files/23722418)
Supplement: Supplementary file 1 [file 23722418]

## *Supplementary Material*

### **1 Table 1: List of interviewed experts**

|                              |                                                                                                                                                                                                 |
|------------------------------|-------------------------------------------------------------------------------------------------------------------------------------------------------------------------------------------------|
| Julia Althoff                | Manager at Mesh Collective, an extracurricular educational initiative, member of the advisory board of “Science for All”                                                                        |
| Dr. Helle Becker             | Head of the “Fachstelle Politische Bildung” [Office for Civic Education], member of the advisory board of “Science for All”                                                                     |
| Prof. Dr. Michael Brüggemann | Professor for Communication Studies, especially climate and science communication, Hamburg University                                                                                           |
| Dr. Philipp Burkard          | Head of the foundation Science et Cité, member of the advisory board of “Science for All”                                                                                                       |
| Astrid Faber                 | Head of the Education Department at the Museum for Natural History, Berlin                                                                                                                      |
| Barbara Heinisch             | Researcher at Vienna University, Communications Department and Institute for Translation Studies                                                                                                |
| Dr. Holger Krimmer           | Head of “Zivilgesellschaft in Zahlen” [Civil society in numbers], member of the advisory board of “Science for All”                                                                             |
| Dr. Steffi Ober              | Head of “Zivilgesellschaftliche Plattform Forschungswende” [Civil society platform for transition of science]                                                                                   |
| Andreas Schulz               | Head of the Department for Youth Aid and Childcare, “Evangelische Jugend- und Fürsorgewerk” [Evangelical Youth and Welfare Organization], member of the advisory board of “Science for All”     |
| Dr. Inga Specht              | Researcher at the Department for Teaching, Learning and Consulting, “Deutsches Institut für Erwachsenenbildung, Leibniz-Zentrum für Lebenslanges Lernen” [German Institute for Adult Education] |
| Prof. Dr. Andreas Zick       | Head of the Institute for Interdisciplinary Conflict and Violence Research, Bielefeld University, member of the advisory board of “Science for All”                                             |
